# Supplementary material for: Novel Predictive Factors Scoring Model for Persistent Hypertension after Adrenalectomy in Patients with Primary Aldosteronism
Source: Research Square preprint supplement (doi:10.21203/rs.3.rs-6201700/v1), 2025-04-10
Supplement: Supplementary file 1 [file 6058b4a648749f22ea3ed019.docx]

Supplementary information 1

The multivariable analysis incorporating defined daily dose and the alternative predictive model

Associated factors of postoperative persistent hypertension using univariable and multivariable logistic regression model

| Variables | Univariable | | Multivariable | |
| --- | --- | --- | --- | --- |
| OR (95%CI) | P value | aOR (95%CI) | P value |
| Age ≥ 50 years | 5.83 (3.19-10.65) | <0.001 | 3.00 (1.43-6.29) | 0.003 |
| Female gender | 0.48 (0.28-0.85) | 0.01 |  |  |
| BMI ≥ 25 kg/m2 | 2.14 (1.26-3.61) | <0.001 |  |  |
| Family history of hypertension | 2.17 (0.98-4.8) | 0.05 |  |  |
| Current or past smoking | 2.31 (1.01-5.28) | 0.049 |  |  |
| Duration of hypertension ≥ 5 years | 4.9 (2.82-8.51) | <0.001 | 2.53 (1.31-4.88) | 0.006 |
| Number of antihypertensive medications ≥ 3 | 3.13 (1.79-5.47) | <0.001 |  |  |
| DDD of antihypertensive medication ≥ 3.5 | 3.41 (1.93-6.03) | <0.001 | 3.39 (1.78-6.45) | <0.001 |
| Diabetes mellitus | 3.44 (1.53-7.73) | <0.001 |  |  |
| Chronic kidney disease | 10.23 (2.38-43.87) | <0.001 |  |  |
| Dyslipidemia | 4.92 (2.58-9.4) | <0.001 | 2.17 (1.01-4.64) | 0.046 |
| eGFR < 60 mL/min/1.73 m2 | 5.41 (1.59-18.46) | 0.01 |  |  |
| Presence of LVH | 2.56 (1.34-4.87) | 0.002 |  |  |

Abbreviations: BMI, body mass index; DDD, defined daily dose; eGFR, estimated glomerular infiltration rate; LVH, left ventricular hypertrophy

Final prediction model for postoperative persistent hypertension

|  | Coefficient | Score |
| --- | --- | --- |
| Age |  |  |
| - < 50 years | 0 | 0 |
| - ≥ 50 years | 1.10 (0.36-1.84) | 1 |
| Dyslipidemia |  |  |
| - No | 0 | 0 |
| - Yes | 0.77 (0.01-1.53) | 1 |
| DDD of antihypertensive medication |  |  |
| - < 3.5 | 0 | 0 |
| - ≥ 3.5 | 1.22 (0.58-1.86) | 2 |
| Duration of hypertension |  |  |
| - < 5 years | 0 | 0 |
| - ≥ 5 years | 0.93 (0.27-1.58) | 1 |
| Total | | 5 |
| Internal validation for final model (N=233) | | |
| Hosmer–Lemeshow = 4.87 p-value= 0.30 | | |
| ROC area = 0.79 (95%CI: 0.73-0.85) | | |
| External validation (N=98) | | |
| ROC area = 0.70 (95%CI: 0.60-0.80) | | |

Abbreviations: DDD, defined daily dose

Receiver operating characteristic curves (ROC) and calibration plot of the model.


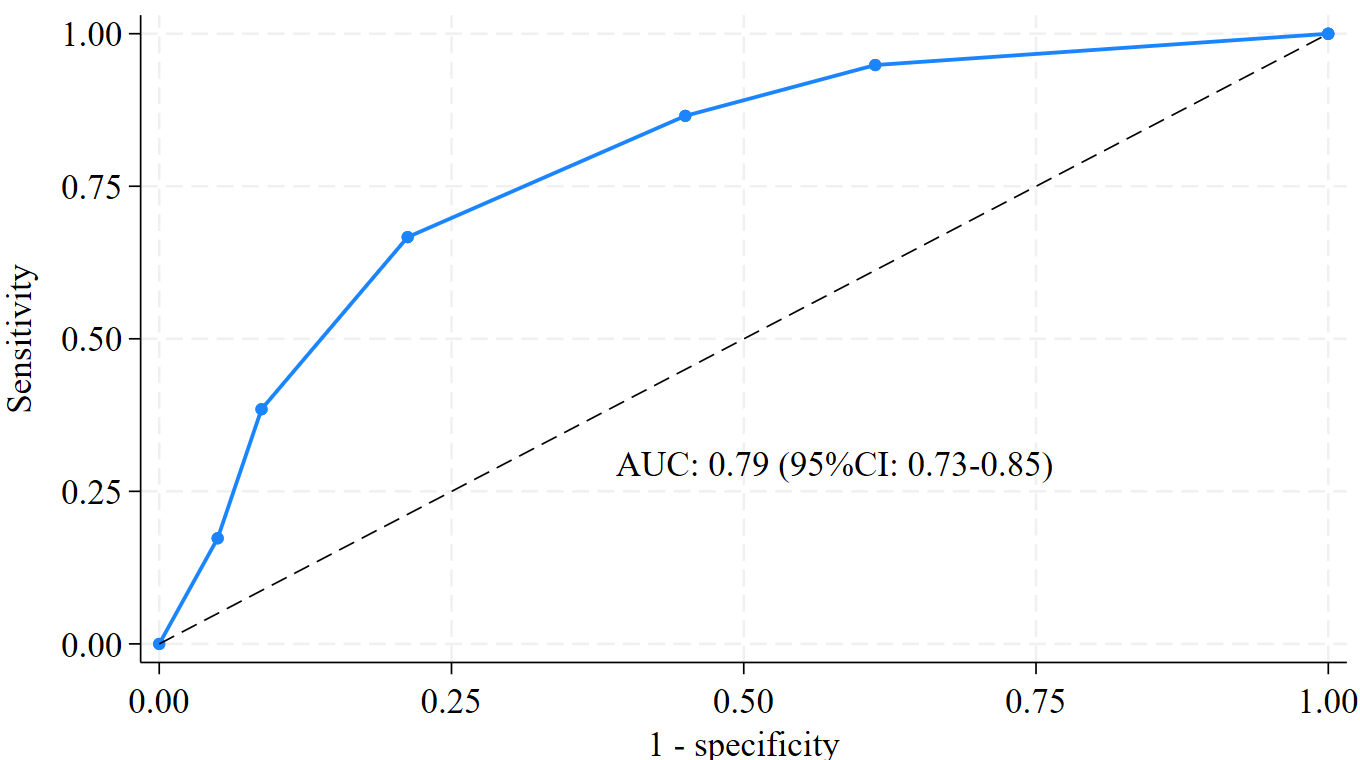


A


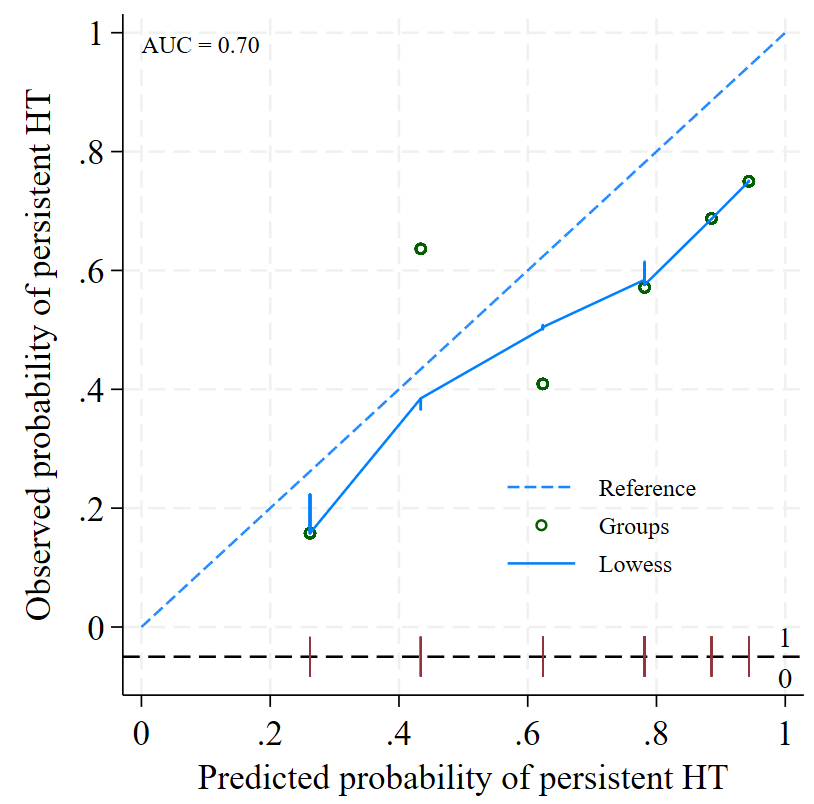


C

B


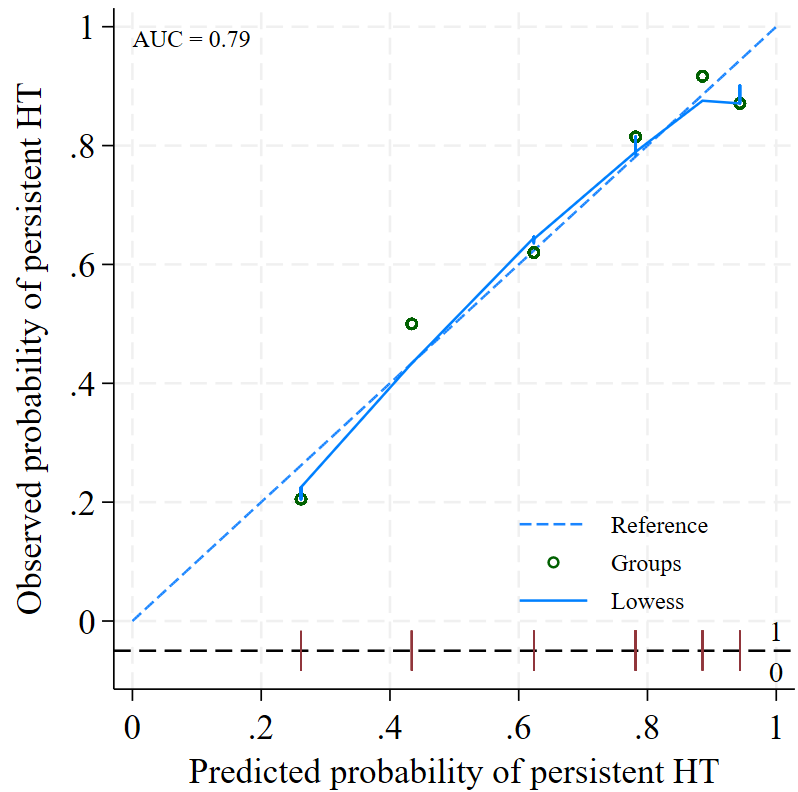


1. ROC of the variables correlated with persistent hypertension (age ≥50 years, presence of dyslipidemia, Defined daily dose of antihypertensive medication ≥ 3.5, and duration of hypertension ≥ 5 years)
2. The calibration plot indicating good agreement predictive possibility in training group
3. The calibration plot indicating good agreement predictive possibility in testing group

Abbreviations: HT, Hypertension

Estimated data on persistent hypertension by score group

| Score | Estimate Not resolved HT by score group |
| --- | --- |
| 0 | 26.2% |
| 1 | 43.4% |
| 2 | 62.4% |
| 3 | 78.2% |
| 4 | 88.5% |
| 5 | 94.3% |
| Risk stratification | |
| 0-1 (Low risk) | 32.3% |
| 2-3 (moderate risk) | 72.1% |
| 4-5 (high risk) | 89.6% |
